# Supplementary material for: Properties of multivesicular release from mouse rod photoreceptors support transmission of single-photon responses
Source: eLife. 2021 Mar 26;10:e67446. doi: 10.7554/eLife.67446 (PMC8032395; doi:10.7554/eLife.67446)
Supplement: Figure 5—source data 1. [file elife-67446-fig5-data1.xlsx]

## Sheet: Sheet1
Multivesicular event start times		Time (ms)	Simulated light response waveform (mV)
4732		0	0
1869.4		0.1	0
4196.2		0.2	0
2948.3		0.3	0
5012.6		0.4	0
1179.9		0.5	0
		0.6	0
4576.1		0.7	0
1788.6		0.8	0
5313.7		0.9	0
3068.9		1	0
3753.2		1.1	0
105.699		1.2	0
5202.8		1.3	0
3970.4		1.4	0
583.297		1.5	0
132.102		1.6	0
1837.6		1.7	0
401.602		1.8	0
828.797		1.9	0
3818.7		2	0
4173.5		2.1	0
5612.9		2.2	0
730.898		2.3	0
3440		2.4	0
1913.3		2.5	0
3102.9		2.6	0
3963.5		2.7	0
3479.9		2.8	0
1201.6		2.9	0
3057.8		3	0
312.398		3.1	0
5160.4		3.2	0
770.398		3.3	0
4274.5		3.4	0
1160.8		3.5	0
3767.5		3.6	0
827.594		3.7	0
4972.59		3.8	0
1204.59		3.9	0
3281		4	0
4830		4.1	0
115.594		4.2	0
129.906		4.3	0
5297.5		4.4	0
1622.7		4.5	0
4814.5		4.6	0
		4.7	0
		4.8	0
659.8		4.9	0
2228		5	0
3606.2		5.1	0
5609.7		5.2	0
649.4		5.3	0
3678.8		5.4	0
2594		5.5	0
1008.6		5.6	0
1824		5.7	0
4818.7		5.8	0
1405.9		5.9	0
4310.9		6	0
186		6.1	0
580		6.2	0
867		6.3	0
3879		6.4	0
3907		6.5	0
4293.6		6.6	0
5174		6.7	0
5378		6.8	0
5409		6.9	0
5869		7	0
		7.1	0
		7.2	0
156.6		7.3	0
2304.2		7.4	0
3840.8		7.5	0
4779.6		7.6	0
5434.1		7.7	0
1149.3		7.8	0
4726		7.9	0
885.5		8	0
4847.4		8.1	0
1799.9		8.2	0
4744.5		8.3	0
3890.9		8.4	0
4117.2		8.5	0
5291.8		8.6	0
4827.8		8.7	0
668.5		8.8	0
5727.5		8.9	0
3453.4		9	0
5289.9		9.1	0
5449.4		9.2	0
5435.7		9.3	0
727.5		9.4	0
5023.1		9.5	0
1853		9.6	0
3746.5		9.7	0
3860.3		9.8	0
1069.7		9.9	0
1307.1		10	0
1918.9		10.1	0
4776.8		10.2	0
5227		10.3	0
5576.2		10.4	0
1857.1		10.5	0
		10.6	0
443.406		10.7	0
1156.91		10.8	0
4848.41		10.9	0
5805		11	0
4149.41		11.1	0
4449.91		11.2	0
		11.3	0
		11.4	0
290.3		11.5	0
2795.3		11.6	0
5740.4		11.7	0
4455.4		11.8	0
4664.1		11.9	0
5371		12	0
4083.1		12.1	0
3147.1		12.2	0
1.8985		12.3	0
2105.8		12.4	0
3214.5		12.5	0
2364.3		12.6	0
3757.6		12.7	0
301		12.8	0
1551		12.9	0
5187		13	0
3692.7		13.1	0
2.5		13.2	0
4963.91		13.3	0
		13.4	0
136.094		13.5	0
3903.5		13.6	0
3792.7		13.7	0
5979.3		13.8	0
		13.9	0
		14	0
580.3		14.1	0
3761.7		14.2	0
5412.8		14.3	0
715		14.4	0
1399		14.5	0
1578.6		14.6	0
4152		14.7	0
3177.9		14.8	0
597.6		14.9	0
3250.4		15	0
1523.3		15.1	0
5340.2		15.2	0
2169.3		15.3	0
5917.1		15.4	0
3827.3		15.5	0
1709.8		15.6	0
5378.2		15.7	0
3050.1		15.8	0
2998.3		15.9	0
5088.1		16	0
818.7		16.1	0
4345.4		16.2	0
1671.8		16.3	0
5139.9		16.4	0
5171		16.5	0
1951.6		16.6	0
932.6		16.7	0
1499.1		16.8	0
3965.5		16.9	0
5502.6		17	0
5561.3		17.1	0
1620		17.2	0
4614.9		17.3	0
		17.4	0
3492.2		17.5	0
929.2		17.6	0
1499.1		17.7	0
3958.5		17.8	0
5502.6		17.9	0
5177.9		18	0
1955.1		18.1	0
1651.1		18.2	0
3879.1		18.3	0
5333.3		18.4	0
677		18.5	0
4473.2		18.6	0
3751.3		18.7	0
		18.8	0
207.3		18.9	0
1772		19	0
5495.7		19.1	0
1889.5		19.2	0
3212.4		19.3	0
5879.1		19.4	0
		19.5	0
1889.5		19.6	0
145.1		19.7	0
4103.6		19.8	0
5640.8		19.9	0
1357.5		20	0
5005.2		20.1	0
3402.4		20.2	0
556.1		20.3	0
2628.7		20.4	0
939.6		20.5	0
176.2		20.6	0
2977.5		20.7	0
2521.6		20.8	0
2549.2		20.9	0
2797.9		21	0
4362.7		21.1	0
3744.4		21.2	0
5575.1		21.3	0
5475		21.4	0
272.9		21.5	0
4179.6		21.6	0
3399		21.7	0
117.4		21.8	0
4107.1		21.9	0
5153.7		22	0
1495.7		22.1	0
5316.1		22.2	0
176.2		22.3	0
569.9		22.4	0
		22.5	0
		22.6	0
3111.8		22.7	0
5404.1		22.8	0
868.1		22.9	0
2105.2		23	0
3643.8		23.1	0
4386.1		23.2	0
278.3		23.3	0
3587.3		23.4	0
446.401		23.5	0
1491.9		23.6	0
4388.8		23.7	0
531.901		23.8	0
2899.7		23.9	0
703.5		24	0
5461.8		24.1	0
3944.1		24.2	0
307.801		24.3	0
4322.7		24.4	0
697.398		24.5	0
2901		24.6	0
5668		24.7	0
3811.9		24.8	0
5204.7		24.9	0
2741.1		25	0
989.602		25.1	0
369		25.2	0
2907.9		25.3	0
4972.1		25.4	0
641.703		25.5	0
4226.9		25.6	0
5840.8		25.7	0
3274.8		25.8	0
1044.8		25.9	0
3430.9		26	0
5450.1		26.1	0
2082.9		26.2	0
4173.2		26.3	0
1074.2		26.4	0
2977.2		26.5	0
4118.4		26.6	0
815.703		26.7	0
3384.4		26.8	0
1114		26.9	0
2966		27	0
5547		27.1	0
15.8985		27.2	0
3151.9		27.3	0
5385.6		27.4	0
153.102		27.5	0
2542		27.6	0
4851.2		27.7	0
5001.8		27.8	0
5266.09		27.9	0
2015		28	0
4973.59		28.1	0
3491.2		28.2	0
2.7031		28.3	0
141.797		28.4	0
230.094		28.5	0
2281.5		28.6	0
5098.09		28.7	0
425.594		28.8	0
616.703		28.9	0
628.297		29	0
1957.91		29.1	0
1166.7		29.2	0
1269.91		29.3	0
1880.91		29.4	0
4772.91		29.5	0
1586		29.6	0
434.406		29.7	0
549.594		29.8	0
4429.91		29.9	0
2846.91		30	0
		30.1	0
		30.2	0
216.1		30.3	0
4079.2		30.4	0
2307.4		30.5	0
4427.2		30.6	0
1364		30.7	0
4781.1		30.8	0
277.398		30.9	0
4560.1		31	0
2974.8		31.1	0
44.3985		31.2	0
1713		31.3	0
5438		31.4	0
2987		31.5	0
3066		31.6	0
2721.2		31.7	0
1709		31.8	0
2282		31.9	0
4804.3		32	0
2909.1		32.1	0
1663.8		32.2	0
5049.8		32.3	0
2368.1		32.4	0
3305.6		32.5	0
4217.9		32.6	0
1762		32.7	0
4948.8		32.8	0
938.406		32.9	0
794.703		33	0
1043.5		33.1	0
4577.3		33.2	0
1757.8		33.3	0
		33.4	0
2842.8		33.5	0
2580.3		33.6	0
214.2		33.7	0
2718.5		33.8	0
3025.9		33.9	0
3547.5		34	0
3955.1		34.1	0
2006.9		34.2	0
1112.3		34.3	0
3785.8		34.4	0
		34.5	0
		34.6	0
69.1		34.7	0
4469.9		34.8	0
2913.1		34.9	0
71.1992		35	0
700.901		35.1	0
5675.5		35.2	0
3202		35.3	0
3660.3		35.4	0
1450.7		35.5	0
317.602		35.6	0
88.1015		35.7	0
658.102		35.8	0
4036.5		35.9	0
107.203		36	0
511.102		36.1	0
4834		36.2	0
309.398		36.3	0
2814.6		36.4	0
3357.5		36.5	0
3.297		36.6	0
1970.8		36.7	0
1305.7		36.8	0
441.297		36.9	0
4296.1		37	0
4498		37.1	0
5145.1		37.2	0
5535.59		37.3	0
575.406		37.4	0
2927.5		37.5	0
940.906		37.6	0
4193.3		37.7	0
856.797		37.8	0
2382.09		37.9	0
4005.7		38	0
959.406		38.1	0
5389.09		38.2	0
3293.09		38.3	0
3751.91		38.4	0
		38.5	0
81.3		38.6	0
145.5		38.7	0
3268.5		38.8	0
4232.7		38.9	0
1635.1		39	0
1494		39.1	0
2430.6		39.2	0
2697.7		39.3	0
4694.7		39.4	0
3256.1		39.5	0
93.6015		39.6	0
257.5		39.7	0
4235.3		39.8	0
2796.1		39.9	0
2513.5		40	0
2256.8		40.1	0
72.1015		40.2	0
1059.9		40.3	0
1505.6		40.4	0
3552.5		40.5	0
3657.2		40.6	0
4299.4		40.7	0
737.102		40.8	0
4903.4		40.9	0
1074.1		41	0
2218.9		41.1	0
3027.2		41.2	0
2486.59		41.3	0
1165.41		41.4	0
5741.09		41.5	0
4934		41.6	0
724.094		41.7	0
423.203		41.8	0
591.594		41.9	0
1157.91		42	0
2401.2		42.1	0
		42.2	0
		42.3	0
1886.6		42.4	0
3435.5		42.5	0
2328.7		42.6	0
1898		42.7	0
591.401		42.8	0
4434.6		42.9	0
3802.3		43	0
2994.2		43.1	0
3354.8		43.2	0
31.6015		43.3	0
4213.4		43.4	0
5509.9		43.5	0
3466.7		43.6	0
		43.7	0
3616.4		43.8	0
5414.6		43.9	0
818.102		44	0
564.898		44.1	0
2283.2		44.2	0
5092.6		44.3	0
5279.5		44.4	0
179.203		44.5	0
4503.9		44.6	0
2805.2		44.7	0
1799.4		44.8	0
4064.5		44.9	0
3832.4		45	0
1144.8		45.1	0
3850.8		45.2	0
5779.5		45.3	0
2930.59		45.4	0
3307.3		45.5	0
4524.59		45.6	0
2627.09		45.7	0
5130.41		45.8	0
617.094		45.9	0
3463.5		46	0
		46.1	0
4528.3		46.2	0
3174		46.3	0
1127.9		46.4	0
4184.5		46.5	0
1484.3		46.6	0
3098.5		46.7	0
1811.3		46.8	0
1559.7		46.9	0
884.7		47	0
1773.6		47.1	0
1945.5		47.2	0
3148.8		47.3	0
4067.1		47.4	0
		47.5	0
		47.6	0
4613.6		47.7	0
1.0995		47.8	0
3469.6		47.9	0
5076.1		48	0
3146.8		48.1	0
5260.4		48.2	0
3807.2		48.3	0
1763.7		48.4	0
5784.6		48.5	0
1128.6		48.6	0
4413.5		48.7	0
1389.9		48.8	0
5548.1		48.9	0
219		49	0
3285.6		49.1	0
1401.5		49.2	0
3461.7		49.3	0
5027.09		49.4	0
4265.41		49.5	0
577.406		49.6	0
3990.41		49.7	0
1553.8		49.8	0
3849.59		49.9	0
955.906		50	0
3160.6		50.1	0
3492.2		50.2	0
		50.3	0
1883.7		50.4	0
3062.4		50.5	0
2787.5		50.6	0
997.398		50.7	0
5862		50.8	0
1497.2		50.9	0
2658.5		51	0
3991.9		51.1	0
2021.9		51.2	0
4326.1		51.3	0
4313.1		51.4	0
4605.2		51.5	0
5287.9		51.6	0
3147.6		51.7	0
4555		51.8	0
2022		51.9	0
2003.8		52	0
78.297		52.1	0
3590.8		52.2	0
656.398		52.3	0
5262.59		52.4	0
3915.2		52.5	0
		52.6	0
105.8		52.7	0
460		52.8	0
3316.9		52.9	0
2286.9		53	0
4753.1		53.1	0
1502.7		53.2	0
4248.1		53.3	0
4855.6		53.4	0
4789.2		53.5	0
4548.5		53.6	0
3796.7		53.7	0
5024.41		53.8	0
		53.9	0
		54	0
175.7		54.1	0
292.599		54.2	0
1834.3		54.3	0
4206.7		54.4	0
726.5		54.5	0
4727.9		54.6	0
5778.7		54.7	0
4854.4		54.8	0
5080.5		54.9	0
977.297		55	0
5139.6		55.1	0
565.602		55.2	0
3608.8		55.3	0
907.102		55.4	0
2821.3		55.5	0
0.7031		55.6	0
4196.6		55.7	0
4205.8		55.8	0
5421.1		55.9	0
4382.3		56	0
4972.09		56.1	0
5030.5		56.2	0
5307.91		56.3	0
1223.91		56.4	0
4672.2		56.5	0
2004.91		56.6	0
5594.41		56.7	0
5539.3		56.8	0
4301.09		56.9	0
1297.8		57	0
3243.7		57.1	0
3095.8		57.2	0
		57.3	0
		57.4	0
4470		57.5	0
2913.2		57.6	0
72.1992		57.7	0
5677.9		57.8	0
3203.5		57.9	0
3663		58	0
1450.7		58.1	0
321.102		58.2	0
88.6992		58.3	0
658.5		58.4	0
4036.7		58.5	0
107.5		58.6	0
4835.1		58.7	0
310.203		58.8	0
2816.1		58.9	0
3358.4		59	0
0.1015		59.1	0
1972.2		59.2	0
1306.5		59.3	0
445		59.4	0
4296.6		59.5	0
4498.7		59.6	0
5145.2		59.7	0
5536		59.8	0
581.094		59.9	0
2928.41		60	0
941		60.1	0
4203.8		60.2	0
858.5		60.3	0
2382.09		60.4	0
4007.59		60.5	0
960.297		60.6	0
5391		60.7	0
3293.2		60.8	0
3752.09		60.9	0
		61	0
		61.1	0
149.9		61.2	0
3272.1		61.3	0
4236		61.4	0
1651.2		61.5	0
1502.2		61.6	0
2703.6		61.7	0
4699		61.8	0
3259.2		61.9	0
103.699		62	0
260.898		62.1	0
4238.2		62.2	0
2799.7		62.3	0
2930.1		62.4	0
2996.7		62.5	0
2522.6		62.6	0
2265.9		62.7	0
46.8985		62.8	0
1061.9		62.9	0
1512.6		63	0
3660.7		63.1	0
4306.6		63.2	0
745.5		63.3	0
4905.1		63.4	0
5044.5		63.5	0
1082.3		63.6	0
2230.9		63.7	0
3029.7		63.8	0
2494		63.9	0
1169.7		64	0
5746.5		64.1	0
4944.8		64.2	0
728.594		64.3	0
427.594		64.4	0
1161.91		64.5	0
		64.6	0
1.4		64.7	0
1901.1		64.8	0
3435.4		64.9	0
2327.8		65	0
1897.4		65.1	0
589.199		65.2	0
4434.5		65.3	0
3802.2		65.4	0
2993.2		65.5	0
3353.4		65.6	0
28.6015		65.7	0
4211.7		65.8	0
5509.5		65.9	0
3466.7		66	0
1899.4		66.1	0
3612.1		66.2	0
5411.1		66.3	0
813		66.4	0
564.703		66.5	0
5092.5		66.6	0
5274.7		66.7	0
177.203		66.8	0
4502.4		66.9	0
2805.1		67	0
1812.8		67.1	0
4063.8		67.2	0
3830.2		67.3	0
1144		67.4	0
3849.2		67.5	0
5778.5		67.6	0
2929.59		67.7	0
3306.7		67.8	0
4524		67.9	0
2621.41		68	0
5130.2		68.1	0
616		68.2	0
3461.3		68.3	0
		68.4	0
		68.5	0
3313.2		68.6	0
3559.7		68.7	0
1279.2		68.8	0
915.801		68.9	0
5026.7		69	0
5111.6		69.1	0
5580.4		69.2	0
1464.7		69.3	0
2658.3		69.4	0
318.199		69.5	0
213.602		69.6	0
3330.7		69.7	0
1639.6		69.8	0
5614.4		69.9	0
1995.5		70	0
5589.9		70.1	0
520.602		70.2	0
4567.8		70.3	0
2034.5		70.4	0
5224.59		70.5	0
1223.09		70.6	0
4610.59		70.7	0
1288.59		70.8	0
4695.59		70.9	0
		71	0
553.9		71.1	0
1914		71.2	0
3050.6		71.3	0
5.6001		71.4	0
49.5		71.5	0
3000.8		71.6	0
4847.6		71.7	0
644.401		71.8	0
1757.3		71.9	0
3916.8		72	0
5672.1		72.1	0
468.901		72.2	0
1303.3		72.3	0
3239.1		72.4	0
3320.9		72.5	0
5256.6		72.6	0
971.801		72.7	0
2015.4		72.8	0
3100.7		72.9	0
4660.9		73	0
1532		73.1	0
3028.2		73.2	0
3874.7		73.3	0
5563.6		73.4	0
1513.7		73.5	0
3261.3		73.6	0
4017.6		73.7	0
5058.7		73.8	0
620.398		73.9	0
2941.1		74	0
4471.1		74.1	0
5785.6		74.2	0
1121.3		74.3	0
3038.8		74.4	0
5109.9		74.5	0
610.102		74.6	0
1570.4		74.7	0
4019.2		74.8	0
4677.5		74.9	0
5289.8		75	0
1123.9		75.1	0
1217.6		75.2	0
2878.2		75.3	0
3955.4		75.4	0
4887.8		75.5	0
344.703		75.6	0
796		75.7	0
1305.4		75.8	0
3370.5		75.9	0
4144.5		76	0
5294.6		76.1	0
22.5		76.2	0
202.398		76.3	0
438.102		76.4	0
4931.6		76.5	0
1891.6		76.6	0
5874.5		76.7	0
3887.4		76.8	0
3648.3		76.9	0
4733.5		77	0
587.797		77.1	0
3495.7		77.2	0
4468		77.3	0
5063		77.4	0
3634.2		77.5	0
5214.2		77.6	0
892.203		77.7	0
2038.8		77.8	0
3729.2		77.9	0
1933		78	0
110.594		78.1	0
1222		78.2	0
3115.8		78.3	0
5627.5		78.4	0
1644.91		78.5	0
3090.5		78.6	0
4692.2		78.7	0
5632.59		78.8	0
2755.41		78.9	0
1303.41		79	0
2003.09		79.1	0
		79.2	0
154.7		79.3	0
1643.5		79.4	0
563.7		79.5	0
5230.2		79.6	0
4925.1		79.7	0
1581.9		79.8	0
3230.8		79.9	0
5220.6		80	0
3671.2		80.1	0
1113.3		80.2	0
3045.2		80.3	0
5355.5		80.4	0
1185.1		80.5	0
3666.9		80.6	0
3099.7		80.7	0
274.602		80.8	0
3761.7		80.9	0
5362.4		81	0
32.1992		81.1	0
3478.4		81.2	0
5727		81.3	0
5805.2		81.4	0
3287.6		81.5	0
4269.6		81.6	0
5207.2		81.7	0
907.703		81.8	0
3959.7		81.9	0
5379.5		82	0
3485.3		82.1	0
1001.8		82.2	0
3429.9		82.3	0
48.8985		82.4	0
2759.3		82.5	0
3907.1		82.6	0
5578		82.7	0
15.8985		82.8	0
3064.7		82.9	0
3233.4		83	0
3184.41		83.1	0
2948.7		83.2	0
4155.91		83.3	0
1298.59		83.4	0
2896.09		83.5	0
3697.2		83.6	0
		83.7	0
		83.8	0
113		83.9	0
5804.4		84	0
1842.1		84.1	0
2919.6		84.2	0
1950.3		84.3	0
5811.4		84.4	0
5408.8		84.5	0
1215.4		84.6	0
3675.6		84.7	0
3177.3		84.8	0
5351.2		84.9	0
1039.2		85	0
4706.6		85.1	0
5121.5		85.2	0
4401.6		85.3	0
4518.4		85.4	0
5058.1		85.5	0
1359.6		85.6	0
5481		85.7	0
706.297		85.8	0
4783.5		85.9	0
778.406		86	0
		86.1	0
		86.2	0
955.1		86.3	0
4566.9		86.4	0
470.7		86.5	0
3235.6		86.6	0
3656.5		86.7	0
3749.8		86.8	0
3944		86.9	0
3961.4		87	0
4000.6		87.1	0
4103.9		87.2	0
4758.6		87.3	0
579.901		87.4	0
851.7		87.5	0
872.7		87.6	0
3268.5		87.7	0
4164.6		87.8	0
4252.2		87.9	0
4303		88	0
4518.4		88.1	0
4529.3		88.2	0
5534.4		88.3	0
5609.9		88.4	0
3100.1		88.5	0
3183.3		88.6	0
2452.2		88.7	0
2921.3		88.8	0
4933.1		88.9	0
3814.7		89	0
4406.5		89.1	0
4164.6		89.2	0
4282.9		89.3	0
447.5		89.4	0
590.301		89.5	0
2286.7		89.6	0
5704.4		89.7	0
5856.3		89.8	0
1076.1		89.9	0
2978.1		90	0
3728.3		90.1	0
5466.7		90.2	0
5621.5		90.3	0
421.797		90.4	0
4503		90.5	0
369.703		90.6	0
478.703		90.7	0
1159.2		90.8	0
4427.5		90.9	0
5354.6		91	0
688.5		91.1	0
4700.4		91.2	0
5706.9		91.3	0
1090.1		91.4	0
3452.3		91.5	0
4541.4		91.6	0
1037.9		91.7	0
4025.3		91.8	0
5147.3		91.9	0
2018.4		92	0
3641.8		92.1	0
5411.1		92.2	0
1023.5		92.3	0
4137.8		92.4	0
1627.8		92.5	0
431.203		92.6	0
1831.9		92.7	0
3106		92.8	0
4186.3		92.9	0
299.297		93	0
2565.1		93.1	0
4824.9		93.2	0
5596.91		93.3	0
3877.41		93.4	0
5844.8		93.5	0
1407.91		93.6	0
3412.91		93.7	0
782.906		93.8	0
2060.5		93.9	0
4935.91		94	0
294.094		94.1	0
2972.8		94.2	0
5418.3		94.3	0
542.906		94.4	0
2656.59		94.5	0
5701.8		94.6	0
2421.59		94.7	0
4116.5		94.8	0
1317.7		94.9	0
4177.3		95	0
17.297		95.1	0
1246.41		95.2	0
3996.7		95.3	0
		95.4	0
5.1		95.5	0
392.7		95.6	0
5540.7		95.7	0
1965.7		95.8	0
3637.2		95.9	0
4924.7		96	0
1245.3		96.1	0
3013.4		96.2	0
4013.5		96.3	0
5879.8		96.4	0
1534.7		96.5	0
3204.2		96.6	0
5053.4		96.7	0
1075.1		96.8	0
5125.9		96.9	0
598.099		97	0
3015		97.1	0
3852.6		97.2	0
653.102		97.3	0
3434.4		97.4	0
1019.3		97.5	0
2826.3		97.6	0
4786.3		97.7	0
406.801		97.8	0
3889.4		97.9	0
3096.3		98	0
4589.5		98.1	0
1755.3		98.2	0
444.898		98.3	0
5764.9		98.4	0
1466.5		98.5	0
4412.2		98.6	0
1370		98.7	0
3709.1		98.8	0
4836		98.9	0
147.297		99	0
1898.2		99.1	0
4130.2		99.2	0
5336.5		99.3	0
1333.9		99.4	0
4576.8		99.5	0
3220.5		99.6	0
5182.9		99.7	0
2634.3		99.8	0
3306.3		99.9	0
5437.2		100	0
1608.3		100.1	0
2736		100.2	0
849.602		100.3	0
4662.1		100.4	0
1070.8		100.5	0
3875.3		100.6	0
5865.3		100.7	0
3427.3		100.8	0
4582.4		100.9	0
945.594		101	0
2732.5		101.1	0
5084.59		101.2	0
109.703		101.3	0
3347.5		101.4	0
5868.09		101.5	0
3190.41		101.6	0
3978.7		101.7	0
1349.2		101.8	0
2873.59		101.9	0
2874.09		102	0
4956		102.1	0
1419.3		102.2	0
2905.59		102.3	0
4898.59		102.4	0
1293.59		102.5	0
3696.91		102.6	0
5436.3		102.7	0
3022.8		102.8	0
5463.09		102.9	0
		103	0
		103.1	0
3484.4		103.2	0
2517.4		103.3	0
659.801		103.4	0
281.898		103.5	0
1914.6		103.6	0
5857		103.7	0
2434.1		103.8	0
5041.7		103.9	0
2519.7		104	0
3964.2		104.1	0
5017		104.2	0
539.703		104.3	0
3840.9		104.4	0
5678.2		104.5	0
1665.4		104.6	0
4003.3		104.7	0
4616.8		104.8	0
1040.2		104.9	0
3461		105	0
5167.3		105.1	0
2650.2		105.2	0
5141		105.3	0
764.102		105.4	0
1539.4		105.5	0
3419.4		105.6	0
3987.6		105.7	0
5454.9		105.8	0
1232.8		105.9	0
3885.3		106	0
5224.2		106.1	0
183.5		106.2	0
1983.5		106.3	0
4088.7		106.4	0
4659.8		106.5	0
16.6015		106.6	0
1994.7		106.7	0
3378.5		106.8	0
4370.6		106.9	0
1682		107	0
4291.4		107.1	0
5242.4		107.2	0
319.203		107.3	0
2469.2		107.4	0
4830.9		107.5	0
5725.41		107.6	0
1509.3		107.7	0
2743		107.8	0
3726.7		107.9	0
4687.09		108	0
67.5		108.1	0
1485.3		108.2	0
3529.2		108.3	0
4981.2		108.4	0
5733		108.5	0
2070.91		108.6	0
3238.09		108.7	0
4232.5		108.8	0
5398.91		108.9	0
599.703		109	0
1711.2		109.1	0
5000.41		109.2	0
161		109.3	0
2994.91		109.4	0
4176.8		109.5	0
4973.09		109.6	0
5843		109.7	0
1191.41		109.8	0
3010.09		109.9	0
4099.59		110	0
4934.5		110.1	0
839.703		110.2	0
1899.2		110.3	0
3812.91		110.4	0
5788.7		110.5	0
1778.2		110.6	0
3520.3		110.7	0
		110.8	0
1486.7		110.9	0
2038.4		111	0
4268.2		111.1	0
518.102		111.2	0
3154		111.3	0
3860.2		111.4	0
4616.6		111.5	0
157		111.6	0
1350.6		111.7	0
2451		111.8	0
3291.4		111.9	0
4485.3		112	0
5485.8		112.1	0
776.297		112.2	0
3683.9		112.3	0
4563.5		112.4	0
244.5		112.5	0
858.703		112.6	0
4464		112.7	0
1831.91		112.8	0
3566.8		112.9	0
99.9062		113	0
1576.2		113.1	0
2480.09		113.2	0
3654.3		113.3	0
190.906		113.4	0
1232.2		113.5	0
3343.7		113.6	0
4950.2		113.7	0
558		113.8	0
1915		113.9	0
2923.41		114	0
3593.59		114.1	0
3994.2		114.2	0
5675.2		114.3	0
1504.7		114.4	0
2757.8		114.5	0
4895.41		114.6	0
61.094		114.7	0
1109.59		114.8	0
1794		114.9	0
3190.5		115	0
4099.7		115.1	0
5672.91		115.2	0
		115.3	0
519.9		115.4	0
3053.5		115.5	0
3956.8		115.6	0
14.4		115.7	0
1318.1		115.8	0
4883.6		115.9	0
1484.6		116	0
3395.8		116.1	0
210.9		116.2	0
940.099		116.3	0
3076.6		116.4	0
2299.7		116.5	0
5015.8		116.6	0
1295.4		116.7	0
3660.5		116.8	0
15.3985		116.9	0
1946.5		117	0
5725.7		117.1	0
1647.4		117.2	0
3703		117.3	0
4900.9		117.4	0
900.801		117.5	0
5018.4		117.6	0
3440.8		117.7	0
4584.6		117.8	0
5436.5		117.9	0
1050.3		118	0
4824.5		118.1	0
537.703		118.2	0
4184.4		118.3	0
1179.1		118.4	0
4621.2		118.5	0
1034.5		118.6	0
3135		118.7	0
5180.9		118.8	0
3325.1		118.9	0
5271.4		119	0
2051.9		119.1	0
4398.6		119.2	0
5468.1		119.3	0
1544.2		119.4	0
3981.4		119.5	0
5064.8		119.6	0
470.602		119.7	0
2623.3		119.8	0
3437.9		119.9	0
5207.2		120	0
591.398		120.1	0
3006		120.2	0
4924.1		120.3	0
2650.8		120.4	0
5524.7		120.5	0
601.094		120.6	0
3277.59		120.7	0
5371.7		120.8	0
358.797		120.9	0
4749.8		121	0
884.297		121.1	0
1692.41		121.2	0
3251.09		121.3	0
2527		121.4	0
5582.7		121.5	0
897.297		121.6	0
4225.09		121.7	0
342.906		121.8	0
5635.41		121.9	0
3697.2		122	0
4576.91		122.1	0
		122.2	0
		122.3	0
2005		122.4	0
2066.7		122.5	0
3826.6		122.6	0
979.699		122.7	0
1017.6		122.8	0
1050		122.9	0
2735.1		123	0
2859		123.1	0
2875.7		123.2	0
1432		123.3	0
1537.7		123.4	0
569.301		123.5	0
1563.9		123.6	0
2092		123.7	0
2199.2		123.8	0
2207.1		123.9	0
4818.6		124	0
247.399		124.1	0
302.699		124.2	0
336		124.3	0
369.399		124.4	0
2937.2		124.5	0
3005.3		124.6	0
5810.7		124.7	0
1276.2		124.8	0
1329.3		124.9	0
1345.3		125	0
39.297		125.1	0
148		125.2	0
873.797		125.3	0
2403.2		125.4	0
297.899		125.5	0
417.203		125.6	0
1777.3		125.7	0
3382.3		125.8	0
3436.9		125.9	0
3270.3		126	0
3236.5		126.1	0
4425.8		126.2	0
4486.2		126.3	0
4519.6		126.4	0
1598.2		126.5	0
3309.4		126.6	0
665.703		126.7	0
5292.7		126.8	0
5449.8		126.9	0
5291.91		127	0
5443.8		127.1	0
1248.8		127.2	0
1306.2		127.3	0
3857.5		127.4	0
954.594		127.5	0
1090.8		127.6	0
53.4062		127.7	0
140.406		127.8	0
507.594		127.9	0
4644.09		128	0
4795.09		128.1	0
46		128.2	0
170		128.3	0
187.297		128.4	0
203.594		128.5	0
2742.41		128.6	0
582.406		128.7	0
715.203		128.8	0
729		128.9	0
758.703		129	0
807.203		129.1	0
3573.8		129.2	0
373.703		129.3	0
457.203		129.4	0
4014.7		129.5	0
5363.8		129.6	0
3894.2		129.7	0
2335		129.8	0
2501		129.9	0
3544.41		130	0
537.906		130.1	0
651.703		130.2	0
3662.5		130.3	0
5587		130.4	0
2015.3		130.5	0
3061.91		130.6	0
5582.5		130.7	0
3119.41		130.8	0
3097.09		130.9	0
3247.2		131	0
3273.3		131.1	0
3280.7		131.2	0
3296.7		131.3	0
3297.41		131.4	0
3314.09		131.5	0
5559.3		131.6	0
4715.2		131.7	0
578.797		131.8	0
4233.59		131.9	0
3361.81		132	0
3521.81		132.1	0
3538.59		132.2	0
2956.31		132.3	0
3081.91		132.4	0
317.594		132.5	0
3299.09		132.6	0
4946.81		132.7	0
5001.31		132.8	0
2817.41		132.9	0
1998.81		133	0
5147.91		133.1	0
4531.31		133.2	0
293.906		133.3	0
5692.5		133.4	0
5803		133.5	0
5806.41		133.6	0
		133.7	0
		133.8	0
2235.5		133.9	0
4274.4		134	0
1641.4		134.1	0
4167.5		134.2	0
4281.4		134.3	0
277.5		134.4	0
342.801		134.5	0
359.699		134.6	0
838.199		134.7	0
1876.3		134.8	0
1877.7		134.9	0
1944.5		135	0
274.699		135.1	0
345.901		135.2	0
380.099		135.3	0
4602.2		135.4	0
4685.5		135.5	0
5605.1		135.6	0
3649.38		135.7	0
1863.5		135.8	0
3802.81		135.9	0
3886.12		136	0
892.5		136.1	0
		136.2	0
		136.3	0
376		136.4	0
2937.9		136.5	0
1274.5		136.6	0
4633		136.7	0
		136.8	0
485		136.9	0
3403		137	0
2745		137.1	0
941.9		137.2	0
2661.3		137.3	0
1711		137.4	0
3378.8		137.5	0
5224		137.6	0
845.7		137.7	0
		137.8	0
		137.9	0
240		138	0
1990		138.1	0
4070		138.2	0
2780		138.3	0
3910		138.4	0
4450		138.5	0
5170		138.6	0
4780		138.7	0
1459		138.8	0
1848		138.9	0
5447		139	0
3315		139.1	0
430		139.2	0
1788		139.3	0
3531		139.4	0
329		139.5	0
		139.6	0
		139.7	0
533		139.8	0
1202		139.9	0
1363		140	0
1367		140.1	0
1972		140.2	0
2510		140.3	0
3200		140.4	0
3290		140.5	0
3419		140.6	0
3884		140.7	0
3884		140.8	0
4220		140.9	0
4410		141	0
4290		141.1	0
4633		141.2	0
4833		141.3	0
5210		141.4	0
2874		141.5	0
5744		141.6	0
4565		141.7	0
		141.8	0
		141.9	0
13.4		142	0
39.6		142.1	0
245.7		142.2	0
393.3		142.3	0
625.1		142.4	0
644.1		142.5	0
776.2		142.6	0
880.5		142.7	0
1107.2		142.8	0
1224.9		142.9	0
1464.3		143	0
1486.9		143.1	0
1503.9		143.2	0
1517.2		143.3	0
1562		143.4	0
1763.2		143.5	0
1866		143.6	0
1916.9		143.7	0
1978.1		143.8	0
2438.9		143.9	0
2472.5		144	0
2700.3		144.1	0
2717.8		144.2	0
2929		144.3	0
3224		144.4	0
3242		144.5	0
3309.4		144.6	0
3349		144.7	0
3503.8		144.8	0
3865.2		144.9	0
3872.9		145	0
3969.1		145.1	0
4051.3		145.2	0
4115.7		145.3	0
4170.2		145.4	0
4186.6		145.5	0
4191.2		145.6	0
4220		145.7	0
4343.4		145.8	0
4465.7		145.9	0
4468.3		146	0
4488.4		146.1	0
4569.3		146.2	0
4674.7		146.3	0
4674.7		146.4	0
4704.5		146.5	0
4904		146.6	0
5054.1		146.7	0
5196.6		146.8	0
5202.7		146.9	0
5339.5		147	0
5424.9		147.1	0
5426.4		147.2	0
5574.5		147.3	0
5630.4		147.4	0
5680.3		147.5	0
		147.6	0
		147.7	0
1170.3		147.8	0
4737.5		147.9	0
4000		148	0
5042.1		148.1	0
877.8		148.2	0
5394.8		148.3	0
3022		148.4	0
4673.3		148.5	0
3310.6		148.6	0
4749.5		148.7	0
4204.4		148.8	0
5739.5		148.9	0
3651.3		149	0
5495		149.1	0
3114.2		149.2	0
729.5		149.3	0
697.4		149.4	0
4332.7		149.5	0
1402.8		149.6	0
5711.4		149.7	0
3230.5		149.8	0
3230.5		149.9	0
		150	0
		150.1	0
2777		150.2	0
5151		150.3	0
3237		150.4	0
3634		150.5	0
1798		150.6	0
5333		150.7	0
1858		150.8	0
4290		150.9	0
1658		151	0
5824		151.1	0
3126		151.2	0
117		151.3	0
4021		151.4	0
3060		151.5	0
5320		151.6	0
1485		151.7	0
328		151.8	0
1223		151.9	0
4314		152	0
		152.1	0
243		152.2	0
1551		152.3	0
5194		152.4	0
4511		152.5	0
3551		152.6	0
1012		152.7	0
5972		152.8	0
1534		152.9	0
3098.4		153	0
5651		153.1	0
1209		153.2	0
2185		153.3	0
1009		153.4	0
2407		153.5	0
3012		153.6	0
2682		153.7	0
5776		153.8	0
4287		153.9	0
1113		154	0
1420		154.1	0
1111		154.2	0
		154.3	0
		154.4	0
154		154.5	0
189		154.6	0
636		154.7	0
808		154.8	0
996		154.9	0
1189		155	0
1446		155.1	0
1725		155.2	0
1742		155.3	0
1967		155.4	0
2303		155.5	0
2747		155.6	0
2839		155.7	0
3420		155.8	0
3553		155.9	0
3750		156	0
4024		156.1	0
4025		156.2	0
4126		156.3	0
4180		156.4	0
4446		156.5	0
4506		156.6	0
4747		156.7	0
5025		156.8	0
5284		156.9	0
5435		157	0
5610		157.1	0
		157.2	0
165		157.3	0
262		157.4	0
287		157.5	0
990		157.6	0
1512		157.7	0
1282		157.8	0
1282		157.9	0
1566		158	0
1603		158.1	0
1684		158.2	0
1842		158.3	0
1972		158.4	0
2026		158.5	0
2027		158.6	0
2146		158.7	0
2434		158.8	0
2669		158.9	0
2757		159	0
2973		159.1	0
3002		159.2	0
3120		159.3	0
3160		159.4	0
3552		159.5	0
3575		159.6	0
3612		159.7	0
3906		159.8	0
3944		159.9	0
3957		160	0
4037		160.1	0
4468		160.2	0
4858		160.3	0
4970		160.4	0
5028		160.5	0
5043		160.6	0
5089		160.7	0
5135		160.8	0
5156		160.9	0
5275		161	0
5367		161.1	0
5506		161.2	0
5534		161.3	0
5693		161.4	0
5796		161.5	0
5896		161.6	0
		161.7	0
		161.8	0
5195.25		161.9	0
3753.85		162	0
4651.15		162.1	0
692.15		162.2	0
3905.05		162.3	0
4815.85		162.4	0
5630.15		162.5	0
5383.75		162.6	0
4615.75		162.7	0
3982.95		162.8	0
3135.65		162.9	0
446.05		163	0
4382.35		163.1	0
1991.1		163.2	0
1648.85		163.3	0
3968.05		163.4	0
4014.15		163.5	0
5814.35		163.6	0
2958.95		163.7	0
880.15		163.8	0
3949.75		163.9	0
5601.55		164	0
788.65		164.1	0
1926.7		164.2	0
5882.45		164.3	0
5115.05		164.4	0
234.95		164.5	0
5115.05		164.6	0
234.95		164.7	0
		164.8	0
		164.9	0
		165	0
411		165.1	0
1181		165.2	0
1202		165.3	0
1575		165.4	0
1612		165.5	0
2812		165.6	0
2924		165.7	0
2975.5		165.8	0
3133		165.9	0
4079		166	0
4377		166.1	0
4916		166.2	0
5141		166.3	0
5789		166.4	0
5814		166.5	0
5911		166.6	0
		166.7	0
		166.8	0
30		166.9	0
126		167	0
166		167.1	0
297		167.2	0
440		167.3	0
792		167.4	0
798		167.5	0
804		167.6	0
1100.7		167.7	0
1124.5		167.8	0
1170		167.9	0
1326		168	0
1406		168.1	0
1642		168.2	0
1680		168.3	0
1832.5		168.4	0
1854		168.5	0
1910.8		168.6	0
1942.1		168.7	0
1955.5		168.8	0
2146		168.9	0
2597.7		169	0
2759.6		169.1	0
2903.5		169.2	0
3054.3		169.3	0
3083.7		169.4	0
3227		169.5	0
3349		169.6	0
3571		169.7	0
3566.9		169.8	0
3565		169.9	0
3647		170	0
3922		170.1	0
3930		170.2	0
4247		170.3	0
4258		170.4	0
4314		170.5	0
4337		170.6	0
4566		170.7	0
4621		170.8	0
4644.7		170.9	0
4746		171	0
4769		171.1	0
4902		171.2	0
5073		171.3	0
5110		171.4	0
5183		171.5	0
5422		171.6	0
5551		171.7	0
5800		171.8	0
5833		171.9	0
5981		172	0
5985		172.1	0
		172.2	0
		172.3	0
248.7		172.4	0
1537.1		172.5	0
3461.1		172.6	0
5219.3		172.7	0
262.5		172.8	0
2832.5		172.9	0
3468		173	0
4217.6		173.1	0
5654.6		173.2	0
359.2		173.3	0
1599.3		173.4	0
3374.8		173.5	0
190		173.6	0
632.1		173.7	0
1513		173.8	0
3426.6		173.9	0
4473.2		174	0
5333.3		174.1	0
5599.3		174.2	0
462.9		174.3	0
780.7		174.4	0
1799.7		174.5	0
3253.9		174.6	0
5371.3		174.7	0
4656.3		174.8	0
1240.1		174.9	0
2967.2		175	0
3875.6		175.1	0
4421.4		175.2	0
5084.6		175.3	0
5772		175.4	0
331.6		175.5	0
925.7		175.6	0
1177.9		175.7	0
3050.1		175.8	0
4383.4		175.9	0
5702.9		176	0
462.9		176.1	0
1820.4		176.2	0
3119.2		176.3	0
5609.7		176.4	0
290.2		176.5	0
1640.8		176.6	0
3063.9		176.7	0
4376.5		176.8	0
846.3		176.9	0
1654.6		177	0
2753		177.1	0
3077.7		177.2	0
4072.5		177.3	0
994.8		177.4	0
2891.2		177.5	0
4690.8		177.6	0
3737.5		177.7	0
4355.8		177.8	0
1540.6		177.9	0
3188.3		178	0
4576.9		178.1	0
5761.7		178.2	0
953.4		178.3	0
5150.3		178.4	0
929.2		178.5	0
3602.8		178.6	0
1046.6		178.7	0
3354.1		178.8	0
3177.9		178.9	0
3696		179	0
321.2		179.1	0
1454.2		179.2	0
5806.6		179.3	0
1865.3		179.4	0
3588.9		179.5	0
4473.2		179.6	0
4801.4		179.7	0
683.9		179.8	0
1630.4		179.9	0
3713.3		180	0
5098.4		180.1	0
1001.7		180.2	0
1854.9		180.3	0
3744.4		180.4	0
891.2		180.5	0
1789.3		180.6	0
4162.3		180.7	0
1899.8		180.8	0
3958.5		180.9	0
5388.6		181	0
424.9		181.1	0
1115.7		181.2	0
3602.8		181.3	0
5098.4		181.4	0
1329.9		181.5	0
2711.6		181.6	0
5063.9		181.7	0
3126.1		181.8	0
4041.5		181.9	0
735.8		182	0
2034.5		182.1	0
2583.8		182.2	0
4742.7		182.3	0
		182.4	0
		182.5	0
48.4		182.6	0
286.7		182.7	0
1343.7		182.8	0
3661.5		182.9	0
5081.2		183	0
179.6		183.1	0
1236.6		183.2	0
3343.7		183.3	0
4856.6		183.4	0
829		183.5	0
2217.6		183.6	0
3782.4		183.7	0
1754.7		183.8	0
3240.1		183.9	0
4984.5		184	0
521.6		184.1	0
1457.7		184.2	0
3727.1		184.3	0
110.5		184.4	0
4756.5		184.5	0
1405.9		184.6	0
2877.4		184.7	0
3982.7		184.8	0
5171		184.9	0
1115.7		185	0
3112.3		185.1	0
4773.7		185.2	0
5606.2		185.3	0
1095		185.4	0
2893.4		185.5	0
4034		185.6	0
5645.2		185.7	0
		185.8	0
		185.9	0
1501.7		186	0
3247.6		186.1	0
4605.6		186.2	0
5914.9		186.3	0
340.4		186.4	0
3616.6		186.5	0
4653.2		186.6	0
5583.5		186.7	0
5955.5		186.8	0
1437		186.9	0
4266.4		187	0
1054.9		187.1	0
3465.6		187.2	0
5722.1		187.3	0
449.2		187.4	0
4889.9		187.5	0
1649.2		187.6	0
5883.3		187.7	0
4380		187.8	0
338.8		187.9	0
3850.6		188	0
2970.2		188.1	0
5738.7		188.2	0
912.7		188.3	0
1309.6		188.4	0
3862.6		188.5	0
5272.5		188.6	0
381		188.7	0
1065.5		188.8	0
3851.8		188.9	0
4467.1		189	0
516.5		189.1	0
1730.6		189.2	0
3962.1		189.3	0
4684.3		189.4	0
5988		189.5	0
52.6		189.6	0
327.5		189.7	0
667.9		189.8	0
3480.8		189.9	0
4191.8		190	0
4438		190.1	0
4969.7		190.2	0
5414.8		190.3	0
5914.9		190.4	0
454.8		190.5	0
851.7		190.6	0
3982.4		190.7	0
880.3		190.8	0
3137.4		190.9	0
3696.2		191	0
2953.6		191.1	0
4377		191.2	0
5454		191.3	0
4377		191.4	0
5452.5		191.5	0
670.9		191.6	0
2807.5		191.7	0
4867.3		191.8	0
2798.1		191.9	0
265.7		192	0
656.6		192.1	0
1714		192.2	0
3093		192.3	0
3521.5		192.4	0
4394.3		192.5	0
5035.3		192.6	0
5727.4		192.7	0
719.1		192.8	0
3337		192.9	0
2941.6		193	0
3887.5		193.1	0
1042.3		193.2	0
4069.1		193.3	0
5401.4		193.4	0
55.6		193.5	0
1938.4		193.6	0
2728.4		193.7	0
3464.2		193.8	0
4114.2		193.9	0
1677.1		194	0
4002.7		194.1	0
5806.4		194.2	0
567.7		194.3	0
2908		194.4	0
5831.3		194.5	0
3456		194.6	0
5482.6		194.7	0
3533.5		194.8	0
126.4		194.9	0
4591.7		195	0
5742.4		195.1	0
162.6		195.2	0
3871.7		195.3	0
		195.4	0
1364.5		195.5	0
4296.8		195.6	0
1858.1		195.7	0
4911.3		195.8	0
740.3		195.9	0
1543.5		196	0
3362.9		196.1	0
5511.3		196.2	0
619.4		196.3	0
4074.2		196.4	0
		196.5	0
		196.6	0
5444.9		196.7	0
3156.9		196.8	0
4962.2		196.9	0
1621.9		197	0
5247		197.1	0
733.7		197.2	0
3533.4		197.3	0
1264.7		197.4	0
4431.2		197.5	0
5961.4		197.6	0
		197.7	0
		197.8	0
		197.9	0
		198	0
		198.1	0
		198.2	0
		198.3	0
		198.4	0
		198.5	0
		198.6	0
		198.7	0
		198.8	0
		198.9	0
		199	0
		199.1	0
		199.2	0
		199.3	0
		199.4	0
		199.5	0
		199.6	0
		199.7	0
		199.8	0
[truncated: 58,002 more rows]
